# Supplementary material
Source: Springer Nature journal article supplement (https://www.springermedizin.de/resource/supplementary/10194_2014_1043_MOESM3_ESM.pdf/9423272)

■ First analysis □ Second analysis

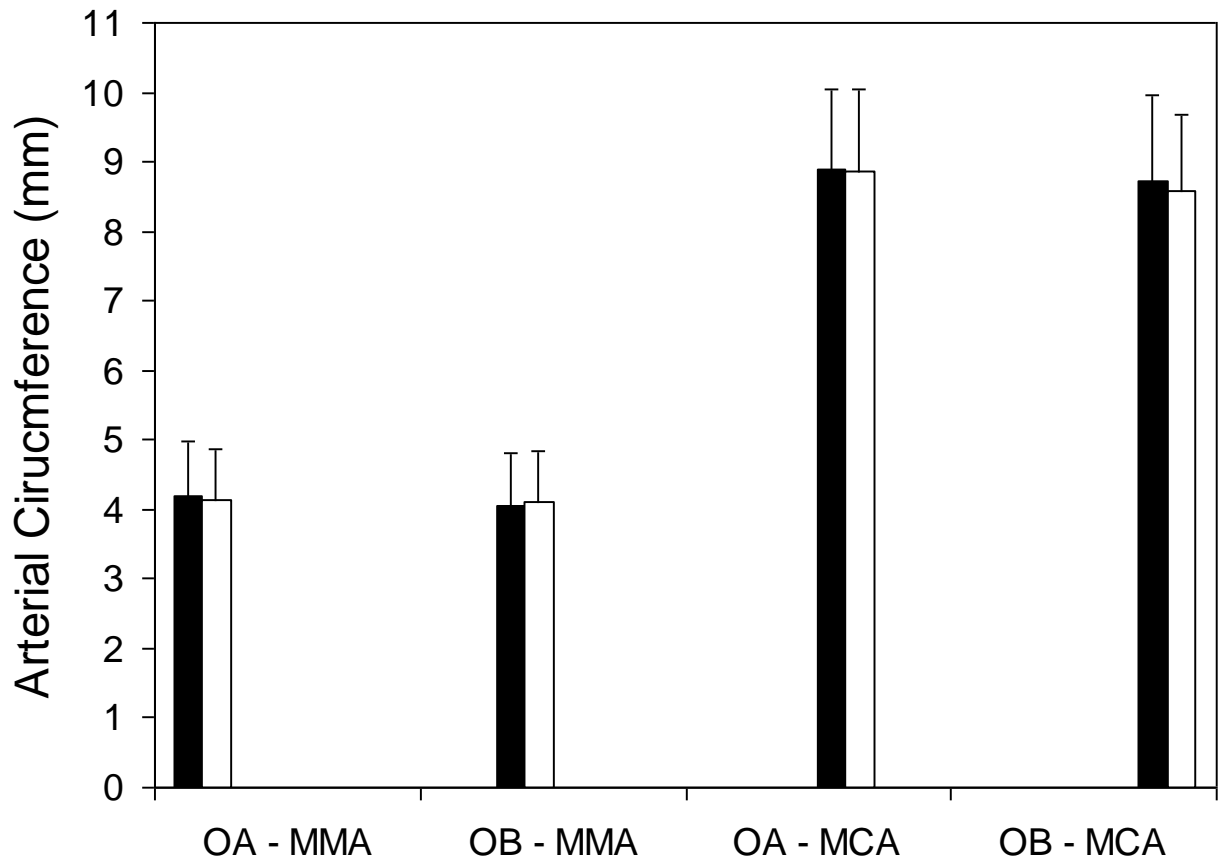

Supplement: MOESM3 [file 9423272]
